# Supplementary material
Source: PubMed Central journal article supplement (PMC2833382)
Supplement: mmc1.pdf [file mmc1.pdf]

## Supplemental Data

### About the X-to-Y Gene Conversion Rate

Fulvio Cruciani, Beniamino Trombetta, Vincent Macaulay, and Rosaria Scozzari

Table S1: List of the MSY polymorphisms identified in the present study

| SNP    | Y-position <sup>a</sup> | Mutation | ChrX <sup>b</sup> | Haplogroup |
|--------|-------------------------|----------|-------------------|------------|
| V138   | 7095980                 | G to A   | G                 | E-M215*    |
| V139.1 | 7096454                 | G to A   | A                 | A-M14      |
| V139.2 | 7096454                 | G to T   | A                 | F-M89*     |
| V140   | 7096456                 | G to T   | G                 | F-M89*     |
| V141   | 7096457                 | A to T   | T                 | A-M14      |
| V142   | 7096610                 | T to G   | T                 | O-M50      |
| V143   | 7096672                 | T to C   | C                 | J-M67      |
| V144   | 7096829                 | C to T   | C/T               | F-M89*     |
| V145   | 7097024                 | T to G   | G                 | A-M13      |

<sup>a</sup>Position according to the February 2009 human Y chromosome reference sequence (GRCh37).

<sup>b</sup>Gametologous base on the X chromosome.

Table S2: Minimum and maximum length of the gene conversion (GC) tracts identified in the *HSA* hotspot of the *PRKY* region

| SNPs involved in GC             | Haplogroup | Length (bp) |     |
|---------------------------------|------------|-------------|-----|
|                                 |            | min         | max |
| V139.1 and V141                 | A-M14      | 4           | 138 |
| V145                            | A-M13      | 1           | 150 |
| V144                            | F-M89*     | 1           | 68  |
| Total bp converted <sup>a</sup> |            | 6           | 356 |
| Total bp converted <sup>b</sup> |            | 5           | 288 |

<sup>a</sup>Considering three gene conversion events. For a 2,348 bp sequence ( $L$ ) and a time of 52,000 generations ( $t$ ), this resulted in a minimum and maximum conversion rate per base per generation of  $4.9 \times 10^{-8}$  to  $2.9 \times 10^{-6}$ , respectively.

<sup>b</sup>Considering two gene conversion events (A-M14; A-M13, see text). For a 2,348 bp sequence ( $L$ ) and a time of 52,000 generations ( $t$ ), this resulted in a minimum and maximum conversion rate per base per generation of  $4.1 \times 10^{-8}$  to  $2.4 \times 10^{-6}$ , respectively.
